# Supplementary material
Source: publisher figshare collection journal article supplement (https://acs.figshare.com/ndownloader/files/4605769)
Supplement: Supplementary file 1 [file 4605769]

  
data_jtb03 
  
_audit_creation_method            SHELXL-97 
_chemical_name_systematic 
; 
 ? 
; 
_chemical_name_common             ? 
_chemical_melting_point           ? 
_chemical_formula_moiety 
 'C22 H29 N O2' 
_chemical_formula_sum 
 'C22 H29 N O2' 
_chemical_formula_weight          339.46 
  
loop_ 
 _atom_type_symbol 
 _atom_type_description 
 _atom_type_scat_dispersion_real 
 _atom_type_scat_dispersion_imag 
 _atom_type_scat_source 
 'C'  'C'   0.0033   0.0016 
 'International Tables Vol C Tables 4.2.6.8 and 6.1.1.4' 
 'H'  'H'   0.0000   0.0000 
 'International Tables Vol C Tables 4.2.6.8 and 6.1.1.4' 
 'N'  'N'   0.0061   0.0033 
 'International Tables Vol C Tables 4.2.6.8 and 6.1.1.4' 
 'O'  'O'   0.0106   0.0060 
 'International Tables Vol C Tables 4.2.6.8 and 6.1.1.4' 
  
_symmetry_cell_setting            Monoclinic 
_symmetry_space_group_name_H-M    P2(1)/c 
  
loop_ 
 _symmetry_equiv_pos_as_xyz 
 'x, y, z' 
 '-x, y+1/2, -z+1/2' 
 '-x, -y, -z' 
 'x, -y-1/2, z-1/2' 
  
_cell_length_a                    18.1917(12) 
_cell_length_b                    8.8565(6) 
_cell_length_c                    24.6411(17) 
_cell_angle_alpha                 90.00 
_cell_angle_beta                  107.826(3) 
_cell_angle_gamma                 90.00 
_cell_volume                      3779.4(4) 
_cell_formula_units_Z             8 
_cell_measurement_temperature     100(2) 
_cell_measurement_reflns_used     4480 
_cell_measurement_theta_min       2.35 
_cell_measurement_theta_max       25.81 
  
_exptl_crystal_description        Needle 
_exptl_crystal_colour             Colorless 
_exptl_crystal_size_max           0.44 
_exptl_crystal_size_mid           0.11 
_exptl_crystal_size_min           0.07 
_exptl_crystal_density_meas       0 
_exptl_crystal_density_diffrn     1.193 
_exptl_crystal_density_method     'not measured' 
_exptl_crystal_F_000              1472 
_exptl_absorpt_coefficient_mu     0.075 
_exptl_absorpt_correction_type    none 
_exptl_absorpt_correction_T_min   0.9676 
_exptl_absorpt_correction_T_max   0.9947 
_exptl_absorpt_process_details    ? 
  
_exptl_special_details 
; 
 ? 
; 
  
_diffrn_ambient_temperature       100(2) 
_diffrn_radiation_wavelength      0.71073 
_diffrn_radiation_type            MoK\a 
_diffrn_radiation_source          'normal-focus sealed tube' 
_diffrn_radiation_monochromator   graphite 
_diffrn_measurement_device_type   'Bruker SMART 1000' 
_diffrn_measurement_method        '\w scans at 3 \f settings' 
_diffrn_detector_area_resol_mean  ? 
_diffrn_standards_number          ? 
_diffrn_standards_interval_count  ? 
_diffrn_standards_interval_time   ? 
_diffrn_standards_decay_%         ? 
_diffrn_reflns_number             25316 
_diffrn_reflns_av_R_equivalents   0.1374 
_diffrn_reflns_av_sigmaI/netI     0.1383 
_diffrn_reflns_limit_h_min        -21 
_diffrn_reflns_limit_h_max        21 
_diffrn_reflns_limit_k_min        -10 
_diffrn_reflns_limit_k_max        10 
_diffrn_reflns_limit_l_min        -30 
_diffrn_reflns_limit_l_max        26 
_diffrn_reflns_theta_min          1.18 
_diffrn_reflns_theta_max          26.20 
_reflns_number_total              6904 
_reflns_number_gt                 3276 
_reflns_threshold_expression      >2sigma(I) 
  
_computing_data_collection        'Bruker SMART v5.630' 
_computing_cell_refinement        'Bruker SAINT v6.45A' 
_computing_data_reduction         'Bruker SAINT v6.45A' 
_computing_structure_solution     'Bruker XS v6.12' 
_computing_structure_refinement   'Bruker XL v6.12' 
_computing_molecular_graphics     'Bruker XP v5.1' 
_computing_publication_material   'Bruker XCIF v6.12' 
  
_refine_special_details 
; 
 Refinement of F^2^ against ALL reflections.  The weighted R-factor wR and 
 goodness of fit S are based on F^2^, conventional R-factors R are based 
 on F, with F set to zero for negative F^2^. The threshold expression of 
 F^2^ > 2sigma(F^2^) is used only for calculating R-factors(gt) etc. and is 
 not relevant to the choice of reflections for refinement.  R-factors based 
 on F^2^ are statistically about twice as large as those based on F, and R- 
 factors based on ALL data will be even larger. 
; 
  
_refine_ls_structure_factor_coef  Fsqd 
_refine_ls_matrix_type            'Full matrix' 
_refine_ls_weighting_scheme       Sigma 
_refine_ls_weighting_details      'w=1/s^2^(Fo^2^)' 
_atom_sites_solution_primary      'Direct methods' 
_atom_sites_solution_secondary    'Difference Fourier map' 
_atom_sites_solution_hydrogens    'Geometric positions' 
_refine_ls_hydrogen_treatment     Riding 
_refine_ls_extinction_method      none 
_refine_ls_extinction_coef        ? 
_refine_ls_number_reflns          6904 
_refine_ls_number_parameters      453 
_refine_ls_number_restraints      0 
_refine_ls_R_factor_all           0.1710 
_refine_ls_R_factor_gt            0.0814 
_refine_ls_wR_factor_ref          0.1283 
_refine_ls_wR_factor_gt           0.1171 
_refine_ls_goodness_of_fit_ref    1.429 
_refine_ls_restrained_S_all       1.429 
_refine_ls_shift/su_max           0.000 
_refine_ls_shift/su_mean          0.000 
  
loop_ 
 _atom_site_label 
 _atom_site_type_symbol 
 _atom_site_fract_x 
 _atom_site_fract_y 
 _atom_site_fract_z 
 _atom_site_U_iso_or_equiv 
 _atom_site_adp_type 
 _atom_site_occupancy 
 _atom_site_symmetry_multiplicity 
 _atom_site_calc_flag 
 _atom_site_refinement_flags 
 _atom_site_disorder_assembly 
 _atom_site_disorder_group 
O1A O 0.52019(15) 0.8135(3) 0.23045(11) 0.0218(7) Uani 1 1 d . . . 
H1AA H 0.5552 0.8453 0.2177 0.033 Uiso 1 1 calc R . . 
O2A O 0.36532(15) 0.4333(3) 0.31337(11) 0.0232(7) Uani 1 1 d . . . 
H2AA H 0.3844 0.5177 0.3097 0.035 Uiso 1 1 calc R . . 
N1A N 0.38809(17) 0.7265(3) 0.33553(13) 0.0165(8) Uani 1 1 d . . . 
C1A C 0.3788(2) 1.0989(4) 0.14895(17) 0.0199(10) Uani 1 1 d . . . 
H1AB H 0.3779 1.1678 0.1783 0.024 Uiso 1 1 calc R . . 
C2A C 0.3386(2) 1.1328(4) 0.09282(16) 0.0197(10) Uani 1 1 d . . . 
H2AB H 0.3108 1.2249 0.0840 0.024 Uiso 1 1 calc R . . 
C3A C 0.3386(2) 1.0331(4) 0.04931(17) 0.0212(10) Uani 1 1 d . . . 
H3AA H 0.3113 1.0569 0.0108 0.025 Uiso 1 1 calc R . . 
C4A C 0.3791(2) 0.8978(5) 0.06282(17) 0.0200(10) Uani 1 1 d . . . 
H4AA H 0.3793 0.8281 0.0335 0.024 Uiso 1 1 calc R . . 
C5A C 0.4194(2) 0.8652(4) 0.11928(17) 0.0184(10) Uani 1 1 d . . . 
H5AA H 0.4466 0.7723 0.1281 0.022 Uiso 1 1 calc R . . 
C6A C 0.4208(2) 0.9646(4) 0.16293(16) 0.0157(9) Uani 1 1 d . . . 
C7A C 0.4629(2) 0.9284(4) 0.22432(16) 0.0159(9) Uani 1 1 d . . . 
H7AA H 0.4884 1.0222 0.2438 0.019 Uiso 1 1 calc R . . 
C8A C 0.4056(2) 0.8722(4) 0.25414(16) 0.0184(10) Uani 1 1 d . . . 
H8AA H 0.3665 0.9520 0.2515 0.022 Uiso 1 1 calc R . . 
H8AB H 0.3783 0.7829 0.2333 0.022 Uiso 1 1 calc R . . 
C9A C 0.4411(2) 0.8294(4) 0.31701(15) 0.0152(9) Uani 1 1 d . . . 
H9AA H 0.4890 0.7702 0.3198 0.018 Uiso 1 1 calc R . . 
C10A C 0.4659(2) 0.9651(4) 0.35713(15) 0.0248(10) Uani 1 1 d . . . 
H10E H 0.5034 1.0269 0.3450 0.030 Uiso 1 1 calc R . . 
H10F H 0.4203 1.0287 0.3547 0.030 Uiso 1 1 calc R . . 
C11A C 0.5026(2) 0.9139(4) 0.41876(17) 0.0254(11) Uani 1 1 d . . . 
H11E H 0.5107 1.0029 0.4442 0.030 Uiso 1 1 calc R . . 
H11F H 0.5538 0.8688 0.4227 0.030 Uiso 1 1 calc R . . 
C12A C 0.4521(2) 0.7973(4) 0.43759(16) 0.0230(10) Uani 1 1 d . . . 
H12E H 0.4810 0.7555 0.4754 0.028 Uiso 1 1 calc R . . 
H12F H 0.4049 0.8469 0.4409 0.028 Uiso 1 1 calc R . . 
C13A C 0.4301(2) 0.6699(4) 0.39360(16) 0.0201(10) Uani 1 1 d . . . 
H13C H 0.4796 0.6255 0.3913 0.024 Uiso 1 1 calc R . . 
C14A C 0.3843(2) 0.5399(4) 0.40882(16) 0.0214(10) Uani 1 1 d . . . 
H14E H 0.3308 0.5742 0.4039 0.026 Uiso 1 1 calc R . . 
H14F H 0.4080 0.5131 0.4494 0.026 Uiso 1 1 calc R . . 
C15A C 0.3818(2) 0.3994(4) 0.37212(16) 0.0183(10) Uani 1 1 d . . . 
H15C H 0.4341 0.3519 0.3851 0.022 Uiso 1 1 calc R . . 
C16A C 0.3242(2) 0.2838(4) 0.38058(17) 0.0175(10) Uani 1 1 d . . . 
C17A C 0.3403(2) 0.2090(4) 0.43252(17) 0.0212(10) Uani 1 1 d . . . 
H17C H 0.3881 0.2262 0.4612 0.025 Uiso 1 1 calc R . . 
C18A C 0.2867(2) 0.1088(4) 0.44293(18) 0.0261(11) Uani 1 1 d . . . 
H18C H 0.2976 0.0592 0.4787 0.031 Uiso 1 1 calc R . . 
C19A C 0.2180(3) 0.0826(4) 0.40094(18) 0.0287(11) Uani 1 1 d . . . 
H19C H 0.1813 0.0151 0.4079 0.034 Uiso 1 1 calc R . . 
C20A C 0.2021(2) 0.1536(4) 0.34888(18) 0.0269(11) Uani 1 1 d . . . 
H20C H 0.1550 0.1337 0.3198 0.032 Uiso 1 1 calc R . . 
C21A C 0.2556(2) 0.2551(4) 0.33879(17) 0.0209(10) Uani 1 1 d . . . 
H21C H 0.2444 0.3045 0.3029 0.025 Uiso 1 1 calc R . . 
C22A C 0.3136(2) 0.7975(5) 0.33222(17) 0.0253(10) Uani 1 1 d . . . 
H22G H 0.2784 0.7211 0.3390 0.038 Uiso 1 1 calc R . . 
H22H H 0.2910 0.8418 0.2943 0.038 Uiso 1 1 calc R . . 
H22I H 0.3218 0.8769 0.3612 0.038 Uiso 1 1 calc R . . 
O2B O 0.13390(15) 1.1950(3) 0.18747(11) 0.0238(7) Uani 1 1 d . . . 
H2BA H 0.1341 1.1008 0.1915 0.036 Uiso 1 1 calc R . . 
O1B O -0.02361(15) 0.8086(3) 0.26503(11) 0.0232(7) Uani 1 1 d . . . 
H1BA H -0.0578 0.7778 0.2788 0.035 Uiso 1 1 calc R . . 
N1B N 0.11483(18) 0.9012(4) 0.16563(13) 0.0195(9) Uani 1 1 d . . . 
C1B C 0.1194(2) 0.5341(4) 0.35343(16) 0.0191(10) Uani 1 1 d . . . 
H1BB H 0.1229 0.4622 0.3257 0.023 Uiso 1 1 calc R . . 
C2B C 0.1570(2) 0.5082(4) 0.41044(17) 0.0207(10) Uani 1 1 d . . . 
H2BB H 0.1867 0.4188 0.4214 0.025 Uiso 1 1 calc R . . 
C3B C 0.1523(2) 0.6094(5) 0.45172(18) 0.0274(11) Uani 1 1 d . . . 
H3BA H 0.1783 0.5901 0.4908 0.033 Uiso 1 1 calc R . . 
C4B C 0.1089(2) 0.7408(4) 0.43520(17) 0.0217(10) Uani 1 1 d . . . 
H4BA H 0.1043 0.8110 0.4631 0.026 Uiso 1 1 calc R . . 
C5B C 0.0727(2) 0.7684(4) 0.37831(16) 0.0182(10) Uani 1 1 d . . . 
H5BA H 0.0447 0.8599 0.3677 0.022 Uiso 1 1 calc R . . 
C6B C 0.0756(2) 0.6679(4) 0.33609(16) 0.0171(9) Uani 1 1 d . . . 
C7B C 0.0361(2) 0.6970(4) 0.27408(17) 0.0194(10) Uani 1 1 d . . . 
H7BA H 0.0136 0.6006 0.2550 0.023 Uiso 1 1 calc R . . 
C8B C 0.0947(2) 0.7579(4) 0.24635(16) 0.0189(10) Uani 1 1 d . . . 
H8BA H 0.1198 0.8482 0.2678 0.023 Uiso 1 1 calc R . . 
H8BB H 0.1353 0.6806 0.2500 0.023 Uiso 1 1 calc R . . 
C9B C 0.0616(2) 0.8002(4) 0.18392(15) 0.0178(10) Uani 1 1 d . . . 
H9BA H 0.0135 0.8597 0.1802 0.021 Uiso 1 1 calc R . . 
C10B C 0.0379(2) 0.6655(4) 0.14364(16) 0.0235(10) Uani 1 1 d . . . 
H10G H -0.0011 0.6050 0.1546 0.028 Uiso 1 1 calc R . . 
H10H H 0.0835 0.6005 0.1477 0.028 Uiso 1 1 calc R . . 
C11B C 0.0044(2) 0.7143(5) 0.08128(17) 0.0252(10) Uani 1 1 d . . . 
H11G H -0.0016 0.6244 0.0564 0.030 Uiso 1 1 calc R . . 
H11H H -0.0474 0.7586 0.0753 0.030 Uiso 1 1 calc R . . 
C12B C 0.0557(2) 0.8299(4) 0.06413(17) 0.0226(10) Uani 1 1 d . . . 
H12G H 0.1036 0.7802 0.0622 0.027 Uiso 1 1 calc R . . 
H12H H 0.0283 0.8709 0.0259 0.027 Uiso 1 1 calc R . . 
C13B C 0.0760(2) 0.9576(4) 0.10722(16) 0.0197(10) Uani 1 1 d . . . 
H13D H 0.0259 1.0026 0.1080 0.024 Uiso 1 1 calc R . . 
C14B C 0.1236(2) 1.0882(4) 0.09319(17) 0.0202(10) Uani 1 1 d . . . 
H14G H 0.1778 1.0550 0.1006 0.024 Uiso 1 1 calc R . . 
H14H H 0.1026 1.1135 0.0522 0.024 Uiso 1 1 calc R . . 
C15B C 0.1218(2) 1.2304(4) 0.12908(17) 0.0205(10) Uani 1 1 d . . . 
H15D H 0.0696 1.2775 0.1138 0.025 Uiso 1 1 calc R . . 
C16B C 0.1817(2) 1.3457(4) 0.12400(17) 0.0195(10) Uani 1 1 d . . . 
C17B C 0.2481(2) 1.3750(4) 0.16857(17) 0.0196(10) Uani 1 1 d . . . 
H17D H 0.2563 1.3253 0.2041 0.024 Uiso 1 1 calc R . . 
C18B C 0.3029(2) 1.4769(4) 0.16161(17) 0.0238(10) Uani 1 1 d . . . 
H18D H 0.3483 1.4959 0.1924 0.029 Uiso 1 1 calc R . . 
C19B C 0.2918(2) 1.5495(4) 0.11077(18) 0.0247(10) Uani 1 1 d . . . 
H19D H 0.3297 1.6179 0.1062 0.030 Uiso 1 1 calc R . . 
C20B C 0.2256(2) 1.5235(4) 0.06611(18) 0.0258(10) Uani 1 1 d . . . 
H20D H 0.2177 1.5749 0.0309 0.031 Uiso 1 1 calc R . . 
C21B C 0.1708(2) 1.4226(4) 0.07254(17) 0.0237(10) Uani 1 1 d . . . 
H21D H 0.1252 1.4054 0.0417 0.028 Uiso 1 1 calc R . . 
C22B C 0.1902(2) 0.8306(5) 0.17171(17) 0.0279(11) Uani 1 1 d . . . 
H22J H 0.2118 0.7912 0.2105 0.042 Uiso 1 1 calc R . . 
H22K H 0.2254 0.9060 0.1644 0.042 Uiso 1 1 calc R . . 
H22L H 0.1835 0.7476 0.1443 0.042 Uiso 1 1 calc R . . 
  
loop_ 
 _atom_site_aniso_label 
 _atom_site_aniso_U_11 
 _atom_site_aniso_U_22 
 _atom_site_aniso_U_33 
 _atom_site_aniso_U_23 
 _atom_site_aniso_U_13 
 _atom_site_aniso_U_12 
O1A 0.0185(15) 0.0181(15) 0.0325(17) 0.0069(14) 0.0133(13) 0.0052(13) 
O2A 0.0287(17) 0.0146(16) 0.0269(17) -0.0040(14) 0.0096(14) -0.0099(13) 
N1A 0.0130(18) 0.0173(19) 0.022(2) 0.0013(16) 0.0103(15) 0.0017(15) 
C1A 0.018(2) 0.015(2) 0.029(3) 0.000(2) 0.011(2) -0.0063(19) 
C2A 0.017(2) 0.016(2) 0.029(3) 0.001(2) 0.010(2) -0.0022(18) 
C3A 0.020(2) 0.021(2) 0.021(2) 0.007(2) 0.0048(19) -0.004(2) 
C4A 0.014(2) 0.023(3) 0.028(3) -0.003(2) 0.013(2) -0.0062(19) 
C5A 0.016(2) 0.013(2) 0.031(3) 0.000(2) 0.013(2) -0.0041(18) 
C6A 0.013(2) 0.012(2) 0.027(2) 0.001(2) 0.0118(19) -0.0060(18) 
C7A 0.014(2) 0.010(2) 0.027(2) 0.0006(18) 0.0114(19) 0.0016(17) 
C8A 0.012(2) 0.013(2) 0.032(2) -0.0059(19) 0.0092(19) -0.0025(18) 
C9A 0.013(2) 0.011(2) 0.021(2) 0.0027(18) 0.0048(18) -0.0010(17) 
C10A 0.029(3) 0.021(2) 0.025(3) -0.002(2) 0.010(2) -0.003(2) 
C11A 0.027(2) 0.019(2) 0.033(3) -0.006(2) 0.013(2) -0.006(2) 
C12A 0.025(2) 0.019(2) 0.028(2) 0.001(2) 0.011(2) 0.003(2) 
C13A 0.022(2) 0.017(2) 0.021(2) 0.001(2) 0.0068(19) -0.0023(19) 
C14A 0.024(2) 0.017(2) 0.023(2) 0.000(2) 0.006(2) -0.0006(19) 
C15A 0.020(2) 0.017(2) 0.019(2) -0.001(2) 0.0079(19) -0.0062(19) 
C16A 0.017(2) 0.009(2) 0.028(3) 0.000(2) 0.009(2) 0.0045(18) 
C17A 0.014(2) 0.021(2) 0.030(3) -0.002(2) 0.0090(19) 0.0007(19) 
C18A 0.026(3) 0.020(2) 0.034(3) 0.006(2) 0.012(2) 0.000(2) 
C19A 0.035(3) 0.011(2) 0.043(3) 0.000(2) 0.016(2) -0.009(2) 
C20A 0.025(2) 0.020(2) 0.035(3) -0.006(2) 0.008(2) -0.007(2) 
C21A 0.027(3) 0.013(2) 0.023(2) -0.0026(19) 0.009(2) 0.0003(19) 
C22A 0.013(2) 0.036(3) 0.030(3) 0.008(2) 0.0097(19) 0.006(2) 
O2B 0.0325(17) 0.0150(16) 0.0322(18) -0.0031(14) 0.0220(14) -0.0041(13) 
O1B 0.0206(16) 0.0187(16) 0.0354(17) 0.0045(14) 0.0162(14) 0.0036(13) 
N1B 0.0169(19) 0.019(2) 0.021(2) -0.0009(17) 0.0045(16) -0.0037(16) 
C1B 0.020(2) 0.015(2) 0.025(3) -0.002(2) 0.011(2) 0.0008(19) 
C2B 0.018(2) 0.016(2) 0.028(3) 0.002(2) 0.006(2) 0.0032(18) 
C3B 0.022(2) 0.031(3) 0.026(3) 0.005(2) 0.004(2) -0.002(2) 
C4B 0.027(2) 0.013(2) 0.027(3) -0.0037(19) 0.010(2) -0.0061(19) 
C5B 0.021(2) 0.008(2) 0.025(3) 0.0028(19) 0.007(2) -0.0009(18) 
C6B 0.017(2) 0.011(2) 0.027(3) -0.0001(19) 0.0111(19) -0.0025(18) 
C7B 0.015(2) 0.012(2) 0.033(3) 0.002(2) 0.0098(19) 0.0034(18) 
C8B 0.017(2) 0.015(2) 0.024(2) -0.0020(19) 0.0058(19) 0.0016(18) 
C9B 0.014(2) 0.016(2) 0.025(2) -0.0047(19) 0.0091(19) -0.0036(18) 
C10B 0.028(2) 0.016(2) 0.027(3) -0.005(2) 0.009(2) 0.003(2) 
C11B 0.027(2) 0.020(2) 0.027(3) -0.007(2) 0.006(2) -0.004(2) 
C12B 0.020(2) 0.023(3) 0.024(2) -0.002(2) 0.005(2) -0.0003(19) 
C13B 0.012(2) 0.019(2) 0.027(3) -0.001(2) 0.0049(19) -0.0033(19) 
C14B 0.015(2) 0.021(2) 0.026(2) 0.001(2) 0.0085(19) -0.0003(18) 
C15B 0.021(2) 0.014(2) 0.028(3) 0.000(2) 0.010(2) 0.0007(19) 
C16B 0.021(2) 0.015(2) 0.025(3) 0.0006(19) 0.012(2) 0.0037(19) 
C17B 0.026(2) 0.013(2) 0.020(2) -0.0014(19) 0.008(2) 0.0004(19) 
C18B 0.016(2) 0.024(3) 0.027(3) -0.004(2) 0.001(2) 0.004(2) 
C19B 0.025(2) 0.014(2) 0.040(3) 0.003(2) 0.016(2) -0.0025(19) 
C20B 0.030(3) 0.018(2) 0.034(3) 0.008(2) 0.017(2) 0.011(2) 
C21B 0.022(2) 0.023(3) 0.027(3) -0.001(2) 0.007(2) 0.001(2) 
C22B 0.020(2) 0.040(3) 0.025(2) 0.005(2) 0.007(2) 0.000(2) 
  
_geom_special_details 
; 
 All esds (except the esd in the dihedral angle between two l.s. planes) 
 are estimated using the full covariance matrix.  The cell esds are taken 
 into account individually in the estimation of esds in distances, angles 
 and torsion angles; correlations between esds in cell parameters are only 
 used when they are defined by crystal symmetry.  An approximate (isotropic) 
 treatment of cell esds is used for estimating esds involving l.s. planes. 
; 
  
loop_ 
 _geom_bond_atom_site_label_1 
 _geom_bond_atom_site_label_2 
 _geom_bond_distance 
 _geom_bond_site_symmetry_2 
 _geom_bond_publ_flag 
O1A C7A 1.432(4) . ? 
O2A C15A 1.418(4) . ? 
N1A C22A 1.474(5) . ? 
N1A C13A 1.488(4) . ? 
N1A C9A 1.496(5) . ? 
C1A C2A 1.385(5) . ? 
C1A C6A 1.399(5) . ? 
C2A C3A 1.388(5) . ? 
C3A C4A 1.393(5) . ? 
C4A C5A 1.390(5) . ? 
C5A C6A 1.384(5) . ? 
C6A C7A 1.506(5) . ? 
C7A C8A 1.531(5) . ? 
C8A C9A 1.533(5) . ? 
C9A C10A 1.533(5) . ? 
C10A C11A 1.529(5) . ? 
C11A C12A 1.544(5) . ? 
C12A C13A 1.531(5) . ? 
C13A C14A 1.533(5) . ? 
C14A C15A 1.531(5) . ? 
C15A C16A 1.525(5) . ? 
C16A C21A 1.377(5) . ? 
C16A C17A 1.390(5) . ? 
C17A C18A 1.399(6) . ? 
C18A C19A 1.376(5) . ? 
C19A C20A 1.377(5) . ? 
C20A C21A 1.401(6) . ? 
O2B C15B 1.422(4) . ? 
O1B C7B 1.435(4) . ? 
N1B C22B 1.472(5) . ? 
N1B C9B 1.487(5) . ? 
N1B C13B 1.482(5) . ? 
C1B C2B 1.381(5) . ? 
C1B C6B 1.419(5) . ? 
C2B C3B 1.378(5) . ? 
C3B C4B 1.396(5) . ? 
C4B C5B 1.376(5) . ? 
C5B C6B 1.382(5) . ? 
C6B C7B 1.498(5) . ? 
C7B C8B 1.530(5) . ? 
C8B C9B 1.517(5) . ? 
C9B C10B 1.528(5) . ? 
C10B C11B 1.532(5) . ? 
C11B C12B 1.530(6) . ? 
C12B C13B 1.517(5) . ? 
C13B C14B 1.546(5) . ? 
C14B C15B 1.545(5) . ? 
C15B C16B 1.525(5) . ? 
C16B C17B 1.386(5) . ? 
C16B C21B 1.399(5) . ? 
C17B C18B 1.394(6) . ? 
C18B C19B 1.367(5) . ? 
C19B C20B 1.379(5) . ? 
C20B C21B 1.384(6) . ? 
  
loop_ 
 _geom_angle_atom_site_label_1 
 _geom_angle_atom_site_label_2 
 _geom_angle_atom_site_label_3 
 _geom_angle 
 _geom_angle_site_symmetry_1 
 _geom_angle_site_symmetry_3 
 _geom_angle_publ_flag 
C22A N1A C13A 113.0(3) . . ? 
C22A N1A C9A 113.0(3) . . ? 
C13A N1A C9A 108.0(3) . . ? 
C2A C1A C6A 120.8(4) . . ? 
C1A C2A C3A 120.6(4) . . ? 
C2A C3A C4A 119.2(4) . . ? 
C5A C4A C3A 119.7(4) . . ? 
C6A C5A C4A 121.6(4) . . ? 
C5A C6A C1A 118.1(4) . . ? 
C5A C6A C7A 121.9(3) . . ? 
C1A C6A C7A 120.0(4) . . ? 
O1A C7A C6A 112.8(3) . . ? 
O1A C7A C8A 107.4(3) . . ? 
C6A C7A C8A 109.9(3) . . ? 
C9A C8A C7A 115.3(3) . . ? 
N1A C9A C10A 111.7(3) . . ? 
N1A C9A C8A 110.3(3) . . ? 
C10A C9A C8A 114.0(3) . . ? 
C11A C10A C9A 111.2(3) . . ? 
C10A C11A C12A 112.2(3) . . ? 
C13A C12A C11A 109.3(3) . . ? 
N1A C13A C14A 109.3(3) . . ? 
N1A C13A C12A 112.3(3) . . ? 
C14A C13A C12A 115.1(3) . . ? 
C13A C14A C15A 112.7(3) . . ? 
O2A C15A C16A 110.0(3) . . ? 
O2A C15A C14A 112.9(3) . . ? 
C16A C15A C14A 111.3(3) . . ? 
C21A C16A C17A 119.2(4) . . ? 
C21A C16A C15A 121.7(3) . . ? 
C17A C16A C15A 119.1(4) . . ? 
C18A C17A C16A 120.6(4) . . ? 
C19A C18A C17A 119.5(4) . . ? 
C20A C19A C18A 120.4(4) . . ? 
C19A C20A C21A 119.9(4) . . ? 
C16A C21A C20A 120.3(4) . . ? 
C22B N1B C9B 112.7(3) . . ? 
C22B N1B C13B 113.2(3) . . ? 
C9B N1B C13B 109.6(3) . . ? 
C2B C1B C6B 120.2(4) . . ? 
C1B C2B C3B 121.3(4) . . ? 
C2B C3B C4B 119.0(4) . . ? 
C5B C4B C3B 119.8(4) . . ? 
C4B C5B C6B 122.4(4) . . ? 
C5B C6B C1B 117.3(4) . . ? 
C5B C6B C7B 122.7(3) . . ? 
C1B C6B C7B 120.0(3) . . ? 
O1B C7B C6B 112.4(3) . . ? 
O1B C7B C8B 106.6(3) . . ? 
C6B C7B C8B 109.5(3) . . ? 
C9B C8B C7B 115.1(3) . . ? 
N1B C9B C8B 111.2(3) . . ? 
N1B C9B C10B 110.7(3) . . ? 
C8B C9B C10B 114.3(3) . . ? 
C9B C10B C11B 112.2(3) . . ? 
C12B C11B C10B 112.2(3) . . ? 
C13B C12B C11B 110.1(3) . . ? 
N1B C13B C12B 111.7(3) . . ? 
N1B C13B C14B 109.7(3) . . ? 
C12B C13B C14B 115.7(3) . . ? 
C15B C14B C13B 111.7(3) . . ? 
O2B C15B C16B 109.7(3) . . ? 
O2B C15B C14B 112.1(3) . . ? 
C16B C15B C14B 111.0(3) . . ? 
C17B C16B C21B 118.3(4) . . ? 
C17B C16B C15B 122.1(4) . . ? 
C21B C16B C15B 119.6(4) . . ? 
C16B C17B C18B 120.4(4) . . ? 
C19B C18B C17B 120.4(4) . . ? 
C18B C19B C20B 120.1(4) . . ? 
C19B C20B C21B 120.0(4) . . ? 
C20B C21B C16B 120.8(4) . . ? 
  
loop_ 
 _geom_hbond_atom_site_label_D 
 _geom_hbond_atom_site_label_H 
 _geom_hbond_atom_site_label_A 
 _geom_hbond_distance_DH 
 _geom_hbond_distance_HA 
 _geom_hbond_distance_DA 
 _geom_hbond_angle_DHA 
 _geom_hbond_site_symmetry_A 
O1A H1AA O2A  0.84 1.99 2.830(4) 176.3 2_655 
O2A H2AA N1A  0.84 1.95 2.660(4) 141.5 . 
O1B H1BA O2B  0.84 1.96 2.801(4) 176.5 2_545 
O2B H2BA N1B  0.84 1.88 2.658(4) 154.4 . 
  
_diffrn_measured_fraction_theta_max    0.911 
_diffrn_reflns_theta_full              26.20 
_diffrn_measured_fraction_theta_full   0.911 
_refine_diff_density_max    0.304 
_refine_diff_density_min   -0.447 
_refine_diff_density_rms    0.078 
